# Supplementary material for: Identification of immunological subtypes of hepatocellular carcinoma with expression profiling of immune-modulating genes
Source: publisher site journal article supplement (doi:10.18632/aging.103395), 2020-06-16
Supplement: Supplementary file [file aging-v12i12-103395-supplementary-material-SD3.pdf]

**Supplemental Table S2. The correlation coefficients between Th1/IFN $\gamma$  signature genes and with B7-H3 or CD47.**

| Gene Symbol     | B7-H3                              |                | CD47                               |                |
|-----------------|------------------------------------|----------------|------------------------------------|----------------|
|                 | Pearson's correlation coefficients | <i>P</i> value | Pearson's correlation coefficients | <i>P</i> value |
| GBP4            | 0.03                               | 0.62           | 0.36                               | 0.00           |
| GBP5            | 0.19                               | 0.00           | 0.28                               | 0.00           |
| GBP1            | -0.17                              | 0.00           | 0.25                               | 0.00           |
| STAT1           | 0.34                               | 0.00           | 0.41                               | 0.00           |
| PTAFR           | 0.47                               | 0.00           | 0.47                               | 0.00           |
| JAK2            | 0.32                               | 0.00           | 0.46                               | 0.00           |
| JAK1            | 0.13                               | 0.02           | 0.41                               | 0.00           |
| APBB2           | 0.10                               | 0.06           | 0.26                               | 0.00           |
| PTPN1           | 0.40                               | 0.00           | 0.31                               | 0.00           |
| CD38            | 0.12                               | 0.02           | 0.19                               | 0.00           |
| OAS3            | 0.21                               | 0.00           | 0.39                               | 0.00           |
| VCAM1           | 0.29                               | 0.00           | 0.12                               | 0.03           |
| DGKI            | 0.25                               | 0.00           | 0.18                               | 0.00           |
| CMAH            | -0.04                              | 0.50           | 0.09                               | 0.09           |
| PIAS1           | 0.35                               | 0.00           | 0.35                               | 0.00           |
| IL12RB2         | -0.09                              | 0.09           | 0.12                               | 0.03           |
| CCL4            | 0.15                               | 0.00           | 0.21                               | 0.00           |
| IRF3            | 0.31                               | 0.00           | 0.28                               | 0.00           |
| HLA-DPA1        | 0.24                               | 0.00           | 0.32                               | 0.00           |
| IFN $\Gamma$    | 0.13                               | 0.01           | 0.22                               | 0.00           |
| CIITA           | 0.26                               | 0.00           | 0.46                               | 0.00           |
| B2M             | -0.11                              | 0.05           | 0.33                               | 0.00           |
| FCGR1A          | 0.37                               | 0.00           | 0.38                               | 0.00           |
| GBP7            | -0.38                              | 0.00           | -0.03                              | 0.61           |
| EGFL6           | 0.40                               | 0.00           | 0.30                               | 0.00           |
| CTLA4           | 0.22                               | 0.00           | 0.24                               | 0.00           |
| IFN $\Gamma$ R1 | -0.18                              | 0.00           | 0.17                               | 0.00           |
| CD44            | 0.19                               | 0.00           | 0.40                               | 0.00           |
| HLA-DQA1        | 0.38                               | 0.00           | 0.34                               | 0.00           |
| DPP4            | -0.22                              | 0.00           | -0.03                              | 0.64           |
| SP100           | -0.05                              | 0.35           | 0.41                               | 0.00           |
| IRF4            | 0.05                               | 0.40           | 0.16                               | 0.00           |
| SGCB            | 0.17                               | 0.00           | 0.23                               | 0.00           |
| FCGR1B          | 0.36                               | 0.00           | 0.35                               | 0.00           |
| GBP6            | 0.15                               | 0.01           | 0.24                               | 0.00           |
| OAS2            | 0.05                               | 0.39           | 0.33                               | 0.00           |
| SUMO1           | 0.19                               | 0.00           | 0.20                               | 0.00           |
| HLA-DQA2        | 0.28                               | 0.00           | 0.27                               | 0.00           |

|          |       |      |       |      |
|----------|-------|------|-------|------|
| DUSP5    | 0.23  | 0.00 | 0.25  | 0.00 |
| ICAM1    | 0.26  | 0.00 | 0.39  | 0.00 |
| IRF2     | 0.09  | 0.09 | 0.32  | 0.00 |
| LTA      | 0.28  | 0.00 | 0.26  | 0.00 |
| HLA-DPB1 | 0.33  | 0.00 | 0.34  | 0.00 |
| LRRN3    | 0.34  | 0.00 | 0.22  | 0.00 |
| SOCS3    | 0.19  | 0.00 | 0.23  | 0.00 |
| HLA-DRB1 | 0.22  | 0.00 | 0.33  | 0.00 |
| HLA-DRB5 | 0.11  | 0.04 | 0.26  | 0.00 |
| IFNTR2   | 0.59  | 0.00 | 0.38  | 0.00 |
| IRF1     | 0.21  | 0.00 | 0.44  | 0.00 |
| APOD     | 0.19  | 0.00 | 0.02  | 0.66 |
| CSF2     | 0.23  | 0.00 | 0.26  | 0.00 |
| DOK5     | 0.12  | 0.02 | 0.11  | 0.04 |
| MT2A     | -0.31 | 0.00 | -0.02 | 0.72 |
| IRF9     | 0.17  | 0.00 | 0.24  | 0.00 |
| NCAM1    | 0.17  | 0.00 | 0.29  | 0.00 |
| CAMK2D   | 0.35  | 0.00 | 0.21  | 0.00 |
| ATP9A    | 0.39  | 0.00 | 0.26  | 0.00 |
| IRF7     | 0.18  | 0.00 | 0.25  | 0.00 |
| OAS1     | 0.00  | 0.93 | 0.24  | 0.00 |
| IRF8     | 0.16  | 0.00 | 0.22  | 0.00 |
| GGT1     | 0.36  | 0.00 | 0.10  | 0.06 |
| CD70     | 0.34  | 0.00 | 0.22  | 0.00 |
| HLA-A    | 0.08  | 0.14 | 0.36  | 0.00 |
| HLA-B    | -0.03 | 0.54 | 0.33  | 0.00 |
| CAMK2B   | -0.01 | 0.82 | -0.01 | 0.90 |
| ZBTB32   | 0.28  | 0.00 | 0.23  | 0.00 |
| GBP2     | 0.10  | 0.06 | 0.38  | 0.00 |
| HBEGF    | 0.34  | 0.00 | 0.32  | 0.00 |
| IL22     | 0.11  | 0.05 | 0.13  | 0.02 |
| CAMK2A   | -0.06 | 0.30 | 0.06  | 0.27 |
| IRF6     | -0.14 | 0.01 | 0.06  | 0.24 |
| SOCS1    | 0.16  | 0.00 | 0.31  | 0.00 |
| BST2     | -0.06 | 0.24 | 0.21  | 0.00 |
| HLA-C    | -0.07 | 0.21 | 0.32  | 0.00 |
| OASL     | -0.22 | 0.00 | 0.09  | 0.11 |
| PTPN6    | 0.42  | 0.00 | 0.36  | 0.00 |
| HLA-F    | -0.06 | 0.26 | 0.29  | 0.00 |
| HLA-G    | 0.00  | 0.97 | 0.24  | 0.00 |
| IRF5     | 0.37  | 0.00 | 0.31  | 0.00 |
| PML      | 0.57  | 0.00 | 0.53  | 0.00 |
| SYNGR3   | 0.38  | 0.00 | 0.37  | 0.00 |
| PTPN2    | 0.56  | 0.00 | 0.40  | 0.00 |

|       |      |      |      |      |
|-------|------|------|------|------|
| PRKCD | 0.57 | 0.00 | 0.35 | 0.00 |
| LRP8  | 0.39 | 0.00 | 0.48 | 0.00 |
| BTG3  | 0.39 | 0.00 | 0.39 | 0.00 |

---
