# Supplementary material for: Identification of immunological subtypes of hepatocellular carcinoma with expression profiling of immune-modulating genes
Source: Aging (Albany NY). 2020 Jun 16;12(12):12187–205. doi: 10.18632/aging.103395 (PMC7343492; doi:10.18632/aging.103395)
Supplement: Supplementary Table 1 [file aging-12-103395-s002..pdf]

## SUPPLEMENTARY TABLES

**Supplementary Table 1. Information of antibodies of CD8, B7-H3, and CD47.**

| <b>Antibody</b> | <b>Clone</b> | <b>Source</b>             | <b>Antigen retrieval condition</b> | <b>Antibody dilution</b> | <b>Antibody incubation time</b> |
|-----------------|--------------|---------------------------|------------------------------------|--------------------------|---------------------------------|
| CD8             | C8/144B      | Cell Signaling Technology | EDTA buffer, pH9.0                 | 1:200                    | 18hrs                           |
| B7-H3 (CD276)   | D9M2L        | Cell Signaling Technology | EDTA buffer, pH9.0                 | 1:300                    | 18hrs                           |
| CD47            | D307P        | Cell Signaling Technology | EDTA buffer, pH 9.0                | 1:300                    | 18hrs                           |

Please browse Full Text version to see the data of Supplementary Table 2.

**Supplementary Table 2. The correlation coefficients between Th1/IFN $\gamma$  signature genes and B7-H3 or CD47.**
